# Supplementary material
Source: publisher figshare collection journal article supplement (https://geolsoc.figshare.com/ndownloader/files/14229401)

# Kernel density diagrams for Iberian I-type granitic rocks

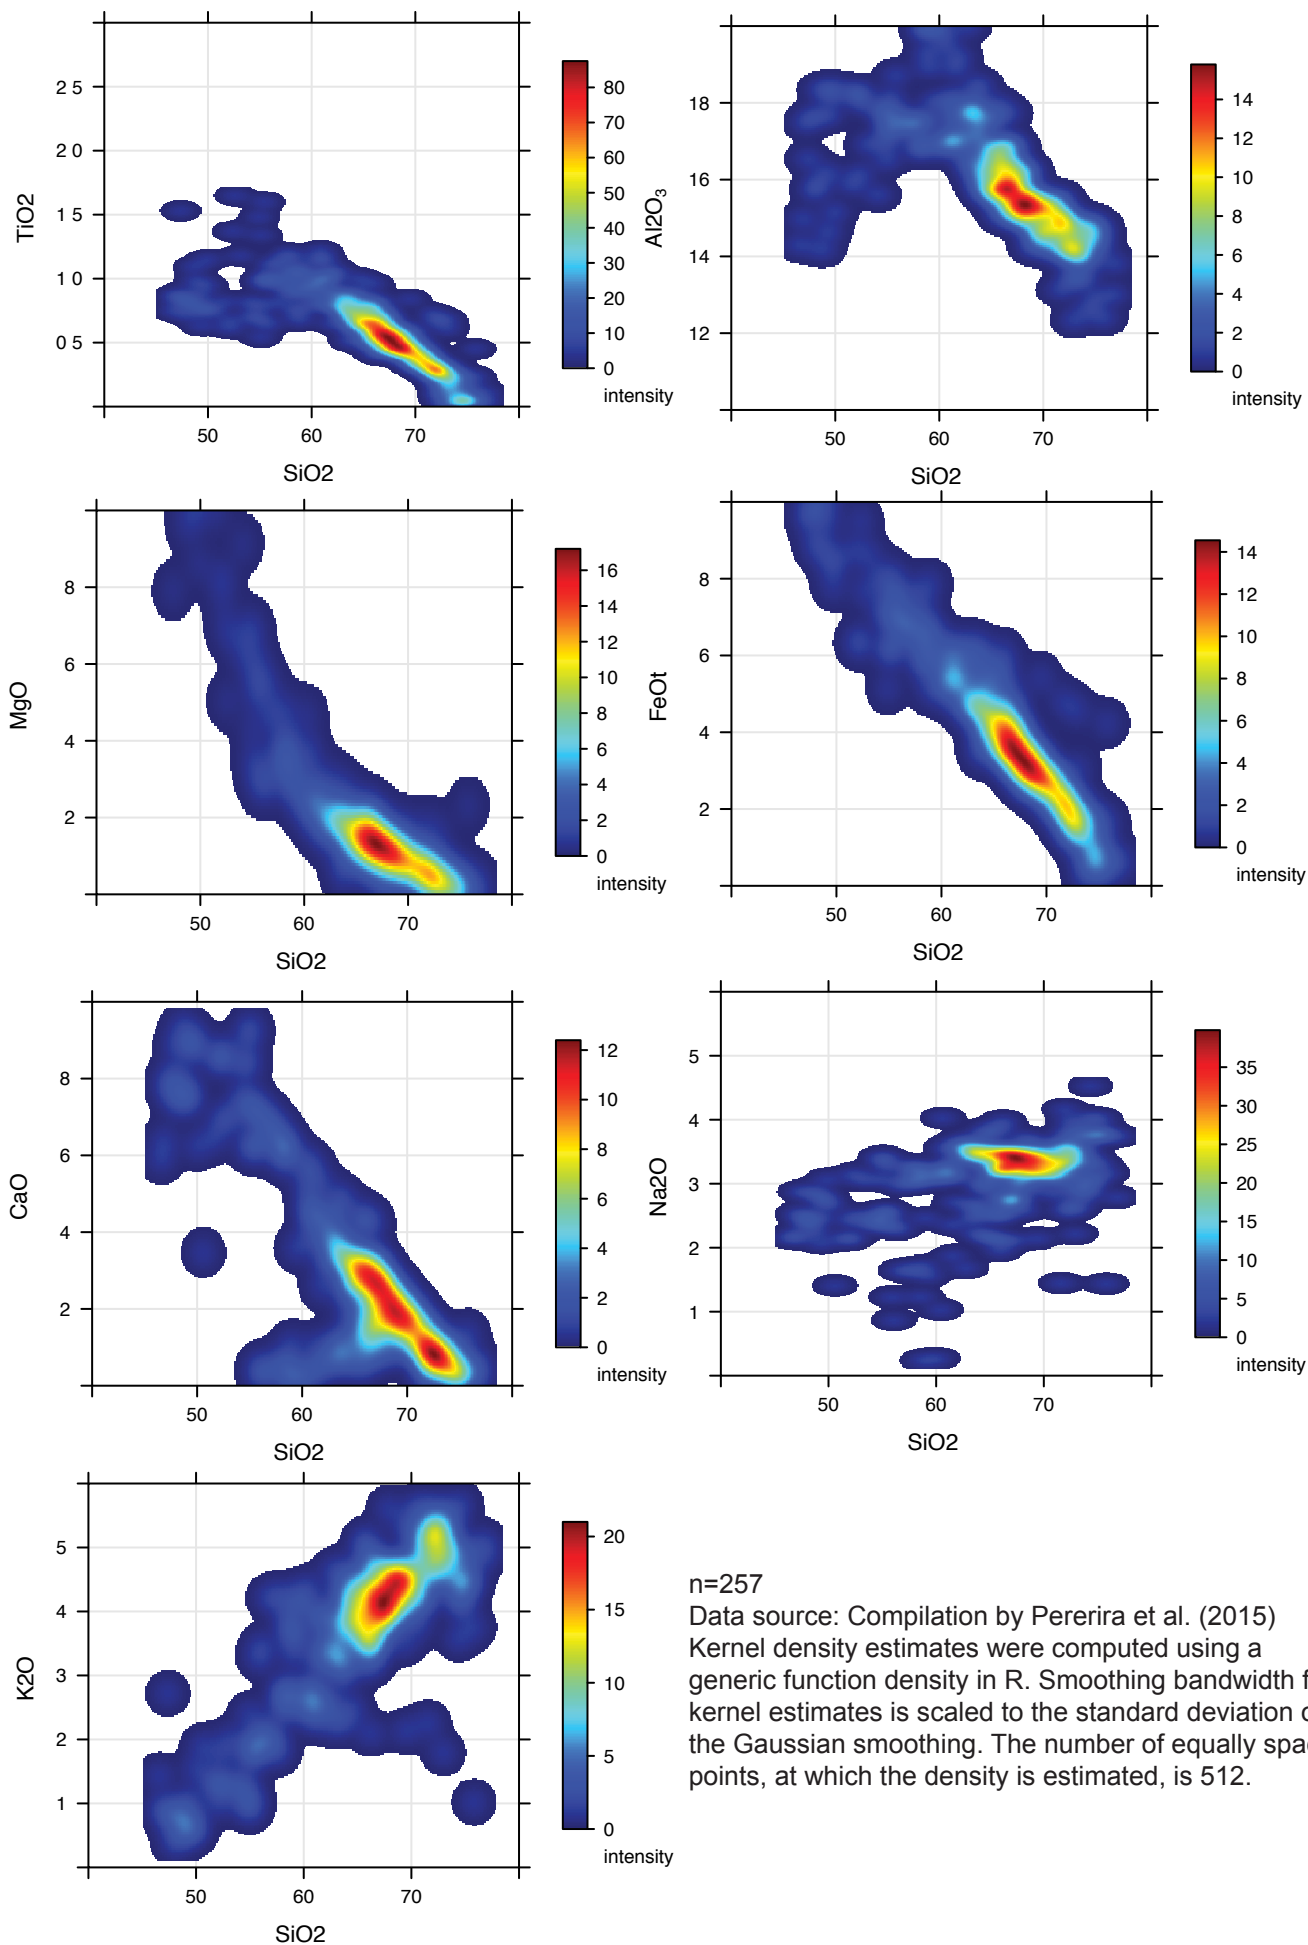

Supplement: Supplementary file 1 [file 14229401]
